# Supplementary material
Source: PubMed Central journal article supplement (PMC7964497)
Supplement: 3308_tables.pdf [file 3308_tables.pdf]

**On-line Table 1: Extended table of FSL-FIRST and FreeSurfer measures of hippocampal asymmetry in the total population and grouped by sex<sup>a</sup>**

| Hippocampal Asymmetry |                 |                 |                 |                 |                 |                 |
|-----------------------|-----------------|-----------------|-----------------|-----------------|-----------------|-----------------|
|                       | 25th Percentile | 50th Percentile | 75th Percentile | 90th Percentile | 98th Percentile | 99th Percentile |
| FSL-FIRST             |                 |                 |                 |                 |                 |                 |
| Total                 | 1.6%            | 3.6%            | 6.2%            | 9.8%            | 16.7%           | 19.9%           |
| Men                   | 1.8%            | 3.8%            | 6.8%            | 11.2%           | 18.0%           | 20.7%           |
| Women                 | 1.5%            | 3.4%            | 5.9%            | 9.2%            | 14.5%           | 18.4%           |
| FreeSurfer            |                 |                 |                 |                 |                 |                 |
| Total                 | 0.8%            | 1.7%            | 2.9%            | 4.5%            | 6.9%            | 8.5%            |
| Men                   | 0.8%            | 1.8%            | 3.2%            | 4.7%            | 7.5%            | 8.5%            |
| Women                 | 0.8%            | 1.7%            | 2.9%            | 4.5%            | 6.4%            | 8.5%            |

<sup>a</sup> Asymmetry is defined by absolute difference in left to right hippocampal volumes with respect to total hippocampal volume.

**On-line Table 2: Extended table of FSL-FIRST and FreeSurfer measures of hippocampal asymmetry grouped by decade<sup>a</sup>**

| Hippocampal Asymmetry |                 |                 |                 |                 |                 |                 |
|-----------------------|-----------------|-----------------|-----------------|-----------------|-----------------|-----------------|
| Decade                | 25th Percentile | 50th Percentile | 75th Percentile | 90th Percentile | 98th Percentile | 99th Percentile |
| FSL-FIRST             |                 |                 |                 |                 |                 |                 |
| 2nd                   | 1.7%            | 2.7%            | 6.1%            | 8.9%            | 16.1%           | 16.1%           |
| 3rd                   | 1.5%            | 3.1%            | 5.4%            | 8.6%            | 12.4%           | 17.3%           |
| 4th                   | 1.7%            | 3.7%            | 6.5%            | 9.8%            | 16.5%           | 20.7%           |
| 5th                   | 1.5%            | 3.5%            | 6.4%            | 11.0%           | 17.0%           | 19.0%           |
| 6th                   | 1.5%            | 3.7%            | 6.6%            | 9.5%            | 18.5%           | 27.5%           |
| 7th                   | 3.1%            | 4.5%            | 7.5%            | 11.3%           | 15.6%           | 16.7%           |
| FreeSurfer            |                 |                 |                 |                 |                 |                 |
| 2nd                   | 0.7%            | 1.7%            | 2.5%            | 3.7%            | 4.3%            | 4.3%            |
| 3rd                   | 0.7%            | 1.6%            | 2.5%            | 4.0%            | 6.8%            | 7.8%            |
| 4th                   | 0.8%            | 1.6%            | 2.8%            | 4.4%            | 6.8%            | 8.9%            |
| 5th                   | 0.8%            | 1.7%            | 3.0%            | 4.5%            | 7.0%            | 8.5%            |
| 6th                   | 0.7%            | 1.8%            | 3.1%            | 4.7%            | 7.4%            | 8.1%            |
| 7th                   | 1.1%            | 1.9%            | 3.8%            | 5.4%            | 8.4%            | 9.3%            |

<sup>a</sup> Asymmetry is defined by absolute difference in left to right hippocampal volumes with respect to total hippocampal volume (2nd decade,  $n = 28$ ; 3rd decade,  $n = 33$ ; 4th decade,  $n = 613$ ; 5th decade,  $n = 601$ ; 6th decade,  $n = 344$ ; 7th decade,  $n = 53$ ; 1st and 8th decades not shown,  $n = 5$ ).
